# Supplementary material for: Carbon isotope discrimination of C3 vegetation in Central Asian grassland as related to long-term and short-term precipitation patterns
Source: Copernicus journal article supplement (doi:10.5194/bg-5-913-2008), 2008-06-11
Supplement: Supplementary file 1 [file bg-5-913-2008-supplement.pdf]

**Table A1** Sampling date, location, mean annual precipitation (MAP), mean daily growing period precipitation ( $P_G$ ), species name and  $^{13}\text{C}$  discrimination ( $^{13}\Delta$ ) of material collected in the 2005 and 2006 sampling campaigns.

| Sampling date | Longitude (°) | Latitude (°) | Elevation (m a.s.l.) | MAP (mm yr <sup>-1</sup> ) | $P_G$ (mm day <sup>-1</sup> ) | Species                | $^{13}\Delta$ (‰) |
|---------------|---------------|--------------|----------------------|----------------------------|-------------------------------|------------------------|-------------------|
| July 2005     | 115°52'       | 43°57'       | 1087                 | 278                        | 0.7                           | <i>S. grandis</i>      | 15.9              |
| July 2005     | 115°43'       | 43°50'       | 1087                 | 276                        | 0.7                           | <i>S. grandis</i>      | 17.5              |
| July 2005     | 115°39'       | 43°55'       | 1087                 | 275                        | 0.7                           | <i>S. grandis</i>      | 17.4              |
| July 2005     | 115°24'       | 43°54'       | 1086                 | 273                        | 0.7                           | <i>S. grandis</i>      | 17.4              |
| July 2005     | 115°07'       | 43°58'       | 1145                 | 263                        | 0.6                           | <i>S. grandis</i>      | 17.0              |
| July 2005     | 114°40'       | 43°57'       | 1092                 | 232                        | 0.5                           | <i>S. grandis</i>      | 17.5              |
| July 2005     | 114°04'       | 43°51'       | 1077                 | 214                        | 0.4                           | <i>S. grandis</i>      | 16.0              |
| July 2005     | 113°15'       | 43°47'       | 1026                 | 177                        | 0.3                           | <i>S. gobica</i>       | 15.7              |
| July 2005     | 112°47'       | 43°44'       | 984                  | 168                        | 0.2                           | <i>S. gobica</i>       | 16.8              |
| July 2005     | 112°15'       | 43°37'       | 951                  | 146                        | 0.1                           | <i>S. gobica</i>       | 15.5              |
| July 2006     | 107°13'       | 47°45'       | 1548                 | 258                        | 1.7                           | <i>S. krylovii</i>     | 16.9              |
| July 2006     | 107°19'       | 47°34'       | 1707                 | 269                        | 1.8                           | <i>S. krylovii</i>     | 19.3              |
| July 2006     | 107°30'       | 47°21'       | 1458                 | 236                        | 1.6                           | <i>S. krylovii</i>     | 18.3              |
| July 2006     | 107°41'       | 47°01'       | 1388                 | 227                        | 1.5                           | <i>S. krylovii</i>     | 18.0              |
| July 2006     | 108°05'       | 46°42'       | 1295                 | 201                        | 1.3                           | <i>S. unidentified</i> | 16.9              |
| July 2006     | 108°27'       | 46°19'       | 1244                 | 201                        | 1.3                           | <i>S. glareosa</i>     | 18.7              |
| July 2006     | 109°35'       | 45°18'       | 1295                 | 137                        | 0.8                           | <i>S. unidentified</i> | 15.8              |
| July 2006     | 109°25'       | 45°48'       | 1022                 | 176                        | 1.1                           | <i>S. glareosa</i>     | 16.9              |
| July 2006     | 109°35'       | 45°18'       | 1007                 | 137                        | 0.8                           | <i>S. unidentified</i> | 15.6              |
| July 2006     | 110°48'       | 44°44'       | 1016                 | 130                        | 0.7                           | <i>S. glareosa</i>     | 18.0              |
| July 2006     | 111°08'       | 44°27'       | 1017                 | 146                        | 0.7                           | <i>S. krylovii</i>     | 17.8              |
| July 2006     | 111°22'       | 44°03'       | 1075                 | 149                        | 0.7                           | <i>S. glareosa</i>     | 18.0              |
| July 2006     | 111°29'       | 43°56'       | 1074                 | 144                        | 0.6                           | <i>S. glareosa</i>     | 16.9              |
| July 2006     | 111°42'       | 43°48'       | 964                  | 132                        | 0.5                           | <i>S. unidentified</i> | 16.7              |
| July 2006     | 111°51'       | 43°43'       | 965                  | 125                        | 0.5                           | <i>S. unidentified</i> | 17.2              |
| July 2006     | 111°31'       | 43°41'       | 1015                 | 142                        | 0.6                           | <i>S. unidentified</i> | 16.2              |
| July 2006     | 111°17'       | 44°02'       | 1072                 | 151                        | 0.7                           | <i>S. unidentified</i> | 15.4              |
| July 2006     | 112°01'       | 45°10'       | 1183                 | 184                        | 0.9                           | <i>S. unidentified</i> | 17.6              |
| July 2006     | 112°38'       | 45°12'       | 1080                 | 183                        | 0.9                           | <i>S. unidentified</i> | 17.3              |
| July 2006     | 113°52'       | 45°18'       | 1257                 | 214                        | 1.0                           | <i>S. krylovii</i>     | 18.4              |
| July 2006     | 114°27'       | 45°34'       | 1352                 | 243                        | 1.1                           | <i>S. krylovii</i>     | 18.0              |
| July 2006     | 114°45'       | 45°38'       | 1318                 | 221                        | 1.0                           | <i>S. grandis</i>      | 18.4              |
| July 2006     | 114°52'       | 45°40'       | 1253                 | 257                        | 1.2                           | <i>S. grandis</i>      | 18.6              |
| July 2006     | 115°19'       | 45°54'       | 1104                 | 264                        | 1.2                           | <i>S. grandis</i>      | 17.9              |
| July 2006     | 114°43'       | 46°03'       | 978                  | 239                        | 1.1                           | <i>S. grandis</i>      | 18.2              |
| July 2006     | 114°08'       | 46°06'       | 1034                 | 225                        | 1.1                           | <i>S. grandis</i>      | 17.8              |
| July 2006     | 113°23'       | 46°53'       | 1088                 | 214                        | 1.1                           | <i>S. grandis</i>      | 19.1              |
| July 2006     | 113°25'       | 46°10'       | 990                  | 221                        | 1.1                           | <i>S. grandis</i>      | 19.7              |
| July 2006     | 113°20'       | 47°02'       | 1117                 | 215                        | 1.2                           | <i>S. grandis</i>      | 18.6              |
| July 2006     | 112°57'       | 46°46'       | 985                  | 209                        | 1.1                           | <i>S. grandis</i>      | 18.4              |
| July 2006     | 112°20'       | 46°49'       | 1052                 | 241                        | 1.3                           | <i>S. grandis</i>      | 17.6              |
| July 2006     | 111°48'       | 47°02'       | 1123                 | 266                        | 1.5                           | <i>S. grandis</i>      | 17.3              |
| July 2006     | 111°16'       | 47°15'       | 1171                 | 268                        | 1.5                           | <i>S. grandis</i>      | 17.5              |
| July 2006     | 110°31'       | 47°23'       | 1137                 | 267                        | 1.6                           | <i>S. grandis</i>      | 17.2              |
| July 2006     | 109°60'       | 47°23'       | 1189                 | 270                        | 1.6                           | <i>S. grandis</i>      | 17.1              |
| August 2006   | 109°37'       | 47°27'       | 1335                 | 279                        | 1.7                           | <i>S. grandis</i>      | 18.0              |
| August 2006   | 109°08'       | 47°39'       | 1368                 | 284                        | 1.8                           | <i>S. grandis</i>      | 18.8              |
| August 2006   | 108°29'       | 47°42'       | 1318                 | 253                        | 1.7                           | <i>S. grandis</i>      | 18.3              |
| August 2006   | 107°41'       | 47°45'       | 1702                 | 265                        | 1.8                           | <i>S. krylovii</i>     | 18.2              |

**Table A2** Source of external data sets, location, species name, mean daily growing period precipitation ( $P_G$ ) determined by kriging between meteorological stations and  $^{13}\text{C}$  discrimination ( $^{13}\Delta$ ).

| Source                  | Longitude<br>(°) | Latitude<br>(°) | Elevation<br>(m a.s.l.) | $P_G$<br>(mm day <sup>-1</sup> ) | Species               | $^{13}\Delta$<br>(‰) |
|-------------------------|------------------|-----------------|-------------------------|----------------------------------|-----------------------|----------------------|
| Cerling and Harris 1999 | 102°00'          | 49°00'          | 1600                    | 1.2                              | <i>S. krylovii</i>    | 15.8                 |
| Chen et al. 2005        | 116°33'          | 43°32'          | 1200                    | 0.7                              | <i>S. grandis</i>     | 15.3                 |
| Liu et al. 2004         | 116°00'          | 43°00'          | 1200                    | 1.2                              | <i>S. baicalensis</i> | 18.2                 |
| Liu et al. 2004         | 116°00'          | 43°00'          | 1200                    | 1.2                              | <i>S. grandis</i>     | 18.8                 |
| Liu et al. 2004         | 116°00'          | 43°00'          | 1200                    | 1.2                              | <i>S. krylovii</i>    | 17.5                 |
| Wang et al. 2005        | 104°06'          | 36°31'          | 1730                    | 2.2                              | <i>S. breviflora</i>  | 18.3                 |
| Wang et al. 2005        | 104°06'          | 36°31'          | 1730                    | 2.2                              | <i>S. breviflora</i>  | 18.8                 |
| Wang et al. 2005        | 104°06'          | 36°31'          | 1730                    | 2.2                              | <i>S. breviflora</i>  | 18.1                 |
| Gao 2004 <sup>1</sup>   | 116°40'          | 43°30'          | 1300                    | 1.8                              | <i>S. grandis</i>     | 19.0                 |
| Gao 2004 <sup>1</sup>   | 116°40'          | 43°30'          | 1300                    | 1.8                              | <i>S. grandis</i>     | 19.0                 |
| Gao 2004 <sup>1</sup>   | 116°40'          | 43°30'          | 1300                    | 1.8                              | <i>S. grandis</i>     | 18.7                 |
| Gao 2004 <sup>1</sup>   | 116°40'          | 43°30'          | 1300                    | 1.8                              | <i>S. grandis</i>     | 18.7                 |
| Gao 2004 <sup>1</sup>   | 116°40'          | 43°30'          | 1300                    | 1.8                              | <i>S. grandis</i>     | 18.7                 |
| Gao 2004 <sup>1</sup>   | 116°40'          | 43°30'          | 1300                    | 1.8                              | <i>S. grandis</i>     | 19.0                 |
| Gao 2004 <sup>1</sup>   | 116°40'          | 43°30'          | 1300                    | 1.8                              | <i>S. grandis</i>     | 18.8                 |
| Gao 2004 <sup>1</sup>   | 116°40'          | 43°30'          | 1300                    | 1.8                              | <i>S. grandis</i>     | 18.7                 |
| Gao 2004 <sup>1</sup>   | 116°40'          | 43°30'          | 1300                    | 1.8                              | <i>S. grandis</i>     | 18.7                 |
| Gao 2004 <sup>1</sup>   | 116°40'          | 43°30'          | 1300                    | 1.8                              | <i>S. grandis</i>     | 18.3                 |
| Gao 2004 <sup>1</sup>   | 116°40'          | 43°30'          | 1300                    | 1.8                              | <i>S. grandis</i>     | 18.2                 |
| Ivanov et al. 2007      | 102°42'          | 43°15'          | 2170                    | 0.6                              | <i>S. glareosa</i>    | 16.7                 |
| Ivanov et al. 2007      | 102°42'          | 43°15'          | 2170                    | 0.6                              | <i>S. glareosa</i>    | 16.0                 |
| Liu et al. 2005         | 103°57'          | 36°20'          | 1646                    | 2.3                              | <i>S. bungeana</i>    | 16.7                 |
| Liu et al. 2005         | 103°57'          | 36°20'          | 1646                    | 2.3                              | <i>S. bungeana</i>    | 19.1                 |
| Liu et al. 2005         | 104°16'          | 35°50'          | 1833                    | 2.5                              | <i>S. bungeana</i>    | 17.4                 |
| Liu et al. 2005         | 104°37'          | 35°35'          | 1900                    | 2.6                              | <i>S. bungeana</i>    | 17.5                 |
| Liu et al. 2005         | 104°38'          | 35°00'          | 1744                    | 2.7                              | <i>S. bungeana</i>    | 18.0                 |
| Liu et al. 2005         | 105°02'          | 35°41'          | 1800                    | 2.7                              | <i>S. bungeana</i>    | 17.0                 |
| Liu et al. 2005         | 105°40'          | 34°52'          | 1222                    | 3.0                              | <i>S. bungeana</i>    | 19.8                 |
| Liu et al. 2005         | 106°38'          | 36°05'          | 1837                    | 3.0                              | <i>S. bungeana</i>    | 18.2                 |
| Liu et al. 2005         | 106°40'          | 35°32'          | 1409                    | 3.1                              | <i>S. bungeana</i>    | 19.5                 |
| Liu et al. 2005         | 106°40'          | 35°32'          | 1409                    | 3.1                              | <i>S. bungeana</i>    | 20.3                 |
| Liu et al. 2005         | 107°04'          | 36°03'          | 1348                    | 3.1                              | <i>S. bungeana</i>    | 19.7                 |
| Liu et al. 2005         | 107°21'          | 34°30'          | 782                     | 3.4                              | <i>S. bungeana</i>    | 19.3                 |
| Liu et al. 2005         | 107°30'          | 38°23'          | 1315                    | 2.4                              | <i>S. bungeana</i>    | 17.6                 |
| Liu et al. 2005         | 107°30'          | 38°23'          | 1315                    | 2.4                              | <i>S. bungeana</i>    | 18.4                 |
| Liu et al. 2005         | 107°37'          | 35°53'          | 1468                    | 3.2                              | <i>S. bungeana</i>    | 19.1                 |
| Liu et al. 2005         | 107°38'          | 35°42'          | 1396                    | 3.2                              | <i>S. bungeana</i>    | 19.3                 |
| Liu et al. 2005         | 107°39'          | 35°04'          | 1015                    | 3.4                              | <i>S. bungeana</i>    | 20.0                 |
| Liu et al. 2005         | 107°42'          | 35°15'          | 1222                    | 3.3                              | <i>S. bungeana</i>    | 19.3                 |
| Liu et al. 2005         | 107°42'          | 35°15'          | 1222                    | 3.3                              | <i>S. bungeana</i>    | 19.9                 |
| Liu et al. 2005         | 107°55'          | 35°58'          | 1044                    | 3.2                              | <i>S. bungeana</i>    | 19.2                 |
| Liu et al. 2005         | 107°58'          | 35°55'          | 1140                    | 3.3                              | <i>S. bungeana</i>    | 19.3                 |
| Liu et al. 2005         | 108°04'          | 34°57'          | 1112                    | 3.4                              | <i>S. bungeana</i>    | 18.2                 |
| Liu et al. 2005         | 108°04'          | 34°57'          | 1112                    | 3.4                              | <i>S. bungeana</i>    | 20.8                 |

**Table A2** continued

| Source           | Longitude<br>(°) | Latitude<br>(°) | Elevation<br>(m a.s.l.) | P <sub>G</sub><br>(mm day <sup>-1</sup> ) | Species            | <sup>13</sup> Δ<br>(‰) |
|------------------|------------------|-----------------|-------------------------|-------------------------------------------|--------------------|------------------------|
| Liu et al. 2005  | 108°27'          | 37°19'          | 1555                    | 3.0                                       | <i>S. bungeana</i> | 19.1                   |
| Liu et al. 2005  | 108°38'          | 35°16'          | 1257                    | 3.5                                       | <i>S. bungeana</i> | 21.5                   |
| Liu et al. 2005  | 108°40'          | 36°08'          | 1185                    | 3.3                                       | <i>S. bungeana</i> | 19.9                   |
| Liu et al. 2005  | 109°06'          | 35°24'          | 1240                    | 3.5                                       | <i>S. bungeana</i> | 19.3                   |
| Liu et al. 2005  | 109°06'          | 35°52'          | 984                     | 3.4                                       | <i>S. bungeana</i> | 19.2                   |
| Liu et al. 2005  | 109°06'          | 35°52'          | 984                     | 3.4                                       | <i>S. bungeana</i> | 20.2                   |
| Liu et al. 2005  | 109°19'          | 34°10'          | 517                     | 3.7                                       | <i>S. bungeana</i> | 19.3                   |
| Liu et al. 2005  | 109°19'          | 35°45'          | 989                     | 3.5                                       | <i>S. bungeana</i> | 20.3                   |
| Liu et al. 2005  | 109°28'          | 36°35'          | 1095                    | 3.3                                       | <i>S. bungeana</i> | 19.2                   |
| Liu et al. 2005  | 108°28'          | 36°35'          | 1362                    | 3.3                                       | <i>S. bungeana</i> | 20.8                   |
| Liu et al. 2005  | 109°28'          | 36°35'          | 1362                    | 3.3                                       | <i>S. bungeana</i> | 19.7                   |
| Liu et al. 2005  | 109°48'          | 37°21'          | 1058                    | 3.1                                       | <i>S. bungeana</i> | 17.9                   |
| Liu et al. 2005  | 110°08'          | 36°00'          | 884                     | 3.5                                       | <i>S. bungeana</i> | 20.1                   |
| Liu et al. 2005  | 110°11'          | 36°04'          | 922                     | 3.5                                       | <i>S. bungeana</i> | 20.7                   |
| Gong et al. 2008 | 116°43'          | 43°35'          | 1300                    | 1.8                                       | <i>S. grandis</i>  | 19.7                   |
| Gong et al. 2008 | 116°43'          | 43°35'          | 1300                    | 1.8                                       | <i>S. grandis</i>  | 19.4                   |
| Gong et al. 2008 | 116°43'          | 43°35'          | 1300                    | 1.0                                       | <i>S. grandis</i>  | 16.9                   |
| Gong et al. 2008 | 116°43'          | 43°35'          | 1300                    | 1.0                                       | <i>S. grandis</i>  | 17.2                   |

**Table A3** Collected species, their mean  $\delta^{13}\text{C} \pm 1$  standard deviation (number of samples), their site-specific contribution to aboveground biomass (remainder mostly C4 species) and the site-mean discrimination of C3 species  $^{13}\Delta_3$  calculated from the site specific  $\delta^{13}\text{C}$  weighted by contribution to C3 biomass

| Species                       | Mean $\delta^{13}\text{C}$<br>(‰) | Contribution to above-ground biomass (%) |        |        |        |        |        |        |        |         |         |         |    |
|-------------------------------|-----------------------------------|------------------------------------------|--------|--------|--------|--------|--------|--------|--------|---------|---------|---------|----|
|                               |                                   | Site 1                                   | Site 2 | Site 3 | Site 4 | Site 5 | Site 6 | Site 7 | Site 9 | Site 12 | Site 13 | Site 14 |    |
|                               | -25.8 ± 1<br>(n=3)                |                                          | 20     | 30     | 5      |        |        |        |        |         |         |         |    |
| <i>Agropyron michnoi</i>      |                                   |                                          |        |        |        |        |        |        |        |         |         |         |    |
| <i>Allium spp.</i>            | -24.5 (n=1)                       |                                          |        | 40     |        |        |        |        |        |         |         |         |    |
|                               | -28.5 ± 0<br>(n=2)                |                                          |        |        |        |        |        |        | 20     | 20      |         |         |    |
| <i>Artemisia spp.</i>         |                                   |                                          |        |        |        |        |        |        |        |         |         |         |    |
| <i>Caragana microphylla</i>   | -26.4 (n=1)                       |                                          |        |        |        |        | 10     |        |        | 5       |         |         |    |
| <i>Caragana stenophylla</i>   | -23.1 (n=1)                       |                                          |        |        |        |        |        |        |        |         |         | 20      |    |
|                               | -26.9 ±<br>(n=2)                  |                                          |        |        |        |        |        |        |        | 10      |         |         |    |
| <i>Chenopodium spp.</i>       |                                   |                                          |        |        |        |        |        |        |        |         |         |         |    |
|                               | -24.9 ± 0.6<br>(n=6)              |                                          | 60     | 30     | 60     | 80     |        |        | 80     |         |         |         |    |
| <i>Leymus chinensis</i>       |                                   |                                          |        |        |        |        |        |        |        |         |         |         |    |
| <i>Medicago falcata</i>       | -25.6 (n=1)                       |                                          |        |        |        |        | 25     |        |        |         |         |         |    |
|                               | -23.8 ± 0.65<br>(n=3)             |                                          |        |        |        |        |        |        |        |         |         | 80      | 70 |
| <i>Stipa gobica</i>           |                                   |                                          |        |        |        |        |        |        |        |         |         |         | 90 |
|                               | -24.8 ± 0.76<br>(n=4)             | 90                                       | 10     |        | 10     |        |        |        |        | 5       |         |         |    |
| <i>Stipa grandis</i>          |                                   |                                          |        |        |        |        |        |        |        |         |         |         |    |
| unknown C3                    | -24.4 (n=1)                       |                                          |        |        |        |        | 40     |        |        |         |         |         |    |
| Site mean $^{13}\Delta_3$ (‰) |                                   | 15.9                                     | 17.4   | 17.3   | 17.3   | 18.0   | 17.4   | 17.5   | 19.8   | 15.7    | 16.5    | 15.5    |    |
